# Supplementary material for: Decoupling layer metal–organic frameworks via ligand regulation to achieve ultra-thin carbon nanosheets for oxygen reduction electrocatalysis
Source: Royal Society of Chemistry journal article supplement (doi:10.1039/d2nr02895f), 2022-01-01
Supplement: d2nr02895f1.pdf [file d2nr02895f1.pdf]

## Supplementary Information

### Decoupling Layer Metal-Organic-Frameworks via Ligand Regulation to Achieving Ultra-Thin Carbon Nanosheets for Oxygen Reduction Electrocatalysis

Zeming Tang, Guiqiang Cao, Cheng Jiang, Jianping He, Adeline Loh, Zhongxu Wang, Jingxiang Zhao, Xiaohong Li,\* Qingxue Lai,\* Yanyu Liang\*

#### Supplementary Figures

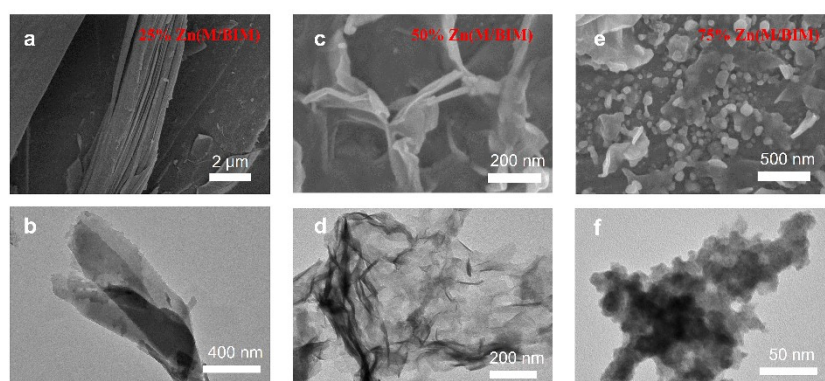

Figure S1. SEM and TEM images of (a,b) 25% Zn(M/BIM) MOFs; (c,d) 50% Zn(M/BIM) MOFs and (e,f) 75% Zn(M/BIM) MOFs

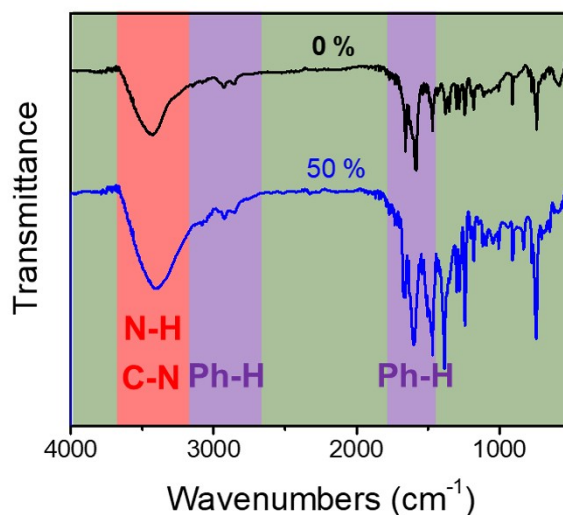

Figure S2. FT-IR pattern of Zn(BIM) and 50% Zn(M/BIM)

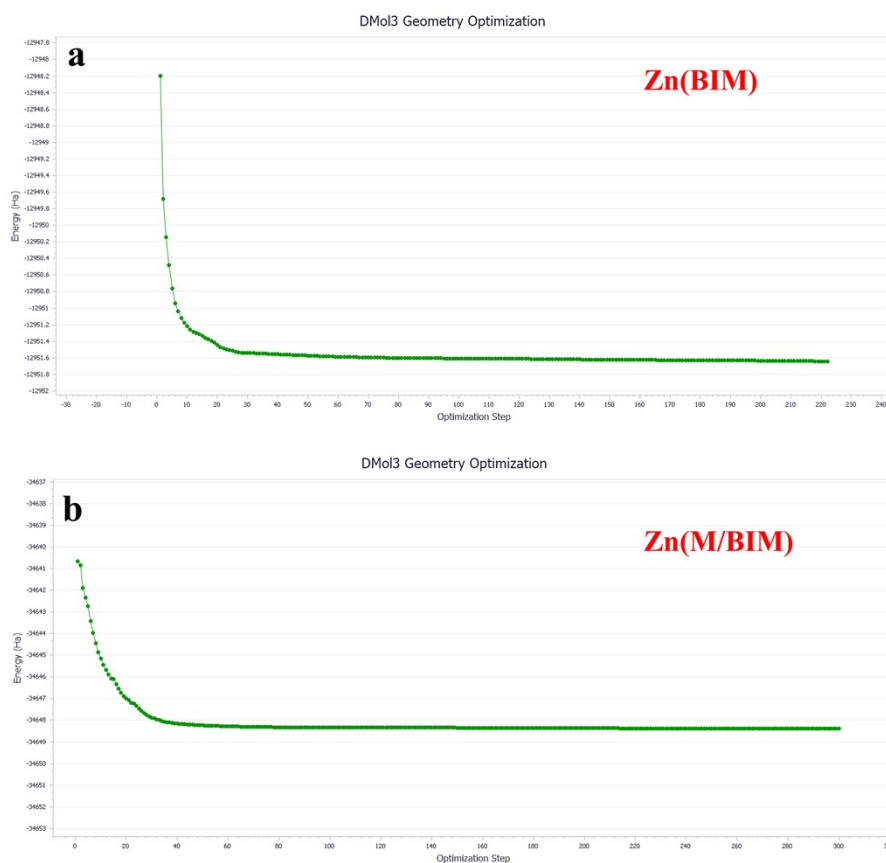

Figure S3. The raw data of optimization step of (a) Zn(BIM) MOFs and (b) Zn(M/BIM) MOFs. Self-consistent field (SCF) convergence precision is set at  $10^{-4}$ .

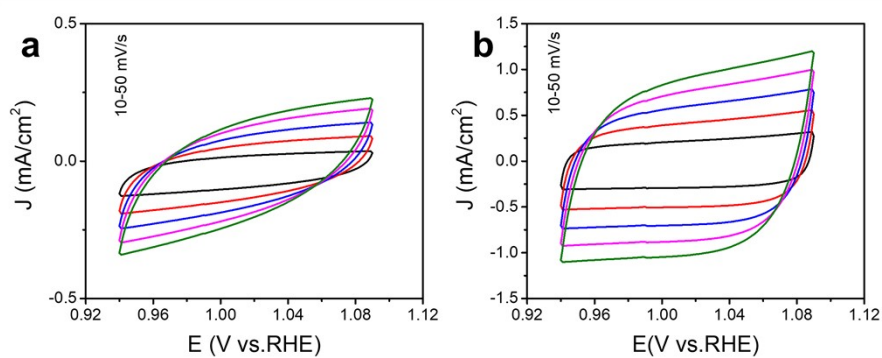

Figure S4. (a,b) CV curves of N-C(BIM) and N-C(M/BIM).

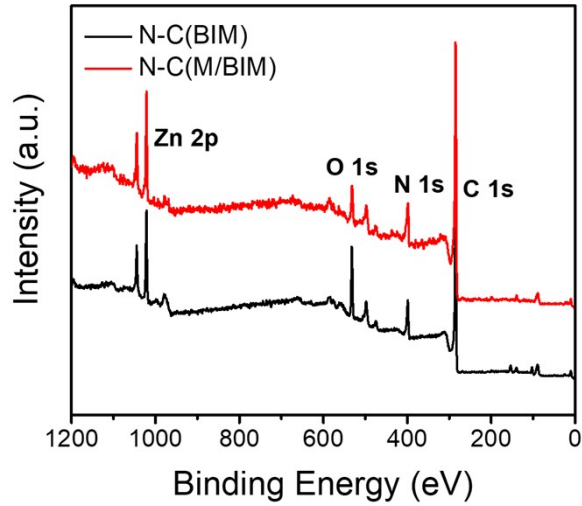

Figure S5. XPS spectra of N-C(BIM) and N-C(M/BIM).

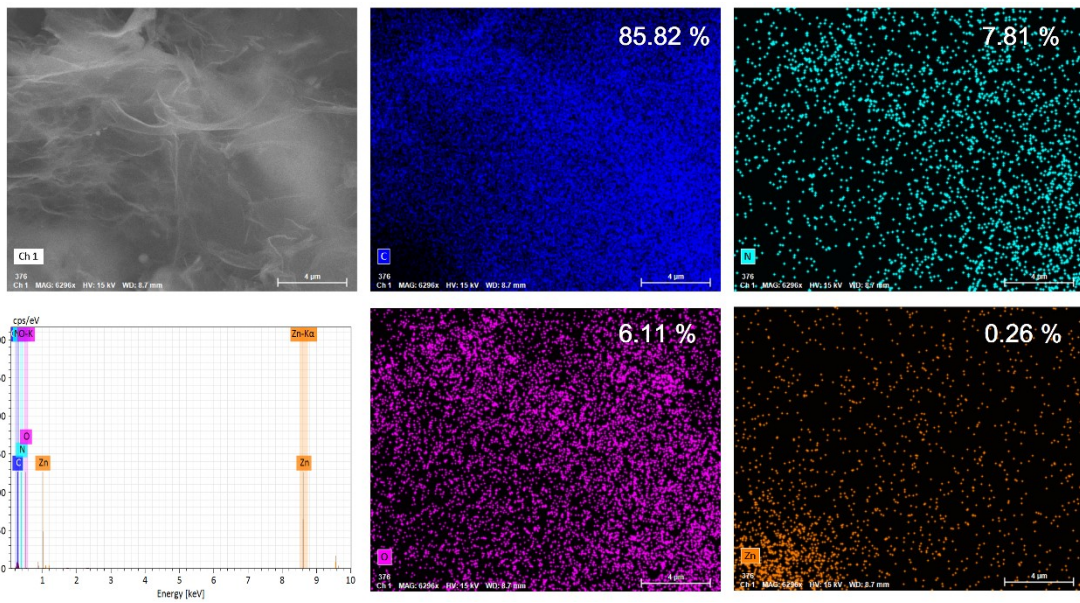

Figure S6. Energy dispersive spectrometer (EDS) spectra and elemental mapping images of UT-N@N-C(M/BIM).

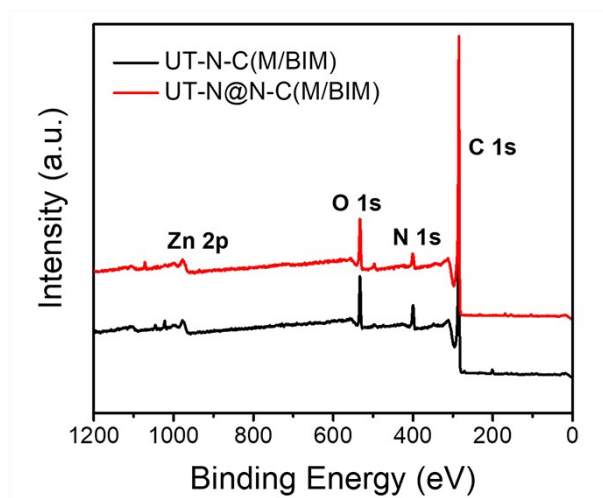

Figure S7. XPS spectra of UT-N-C(M/BIM) and UT-N@N-C(M/BIM)

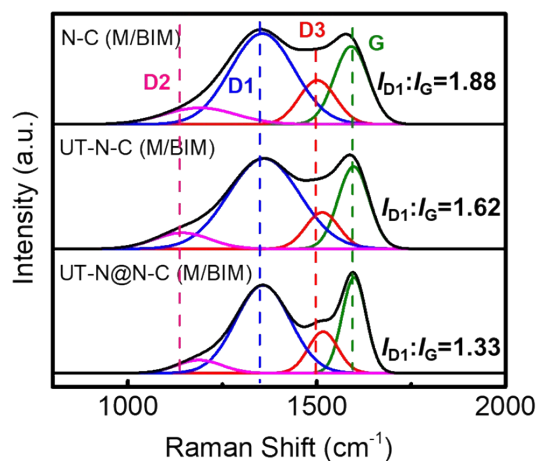

Figure S8. Raman spectra of N-C (M/BIM), UT-N-C (M/BIM) and UT-N@N-C (M/BIM).

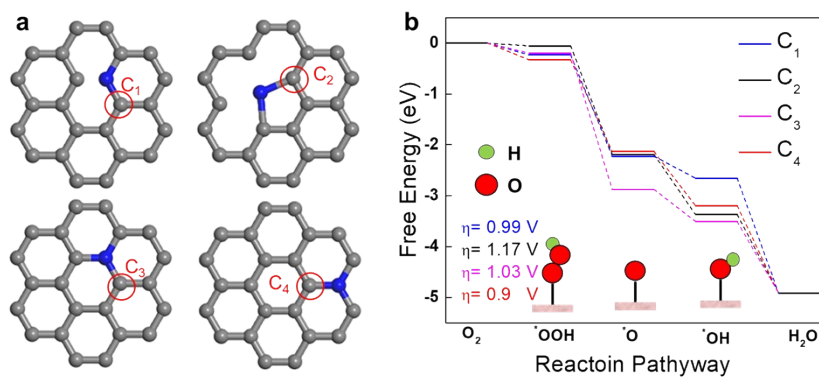

Figure S9. (a) DFT-optimized carbon sites with different N-doping models; (b) ORR free energy diagrams calculated for the four C sites.

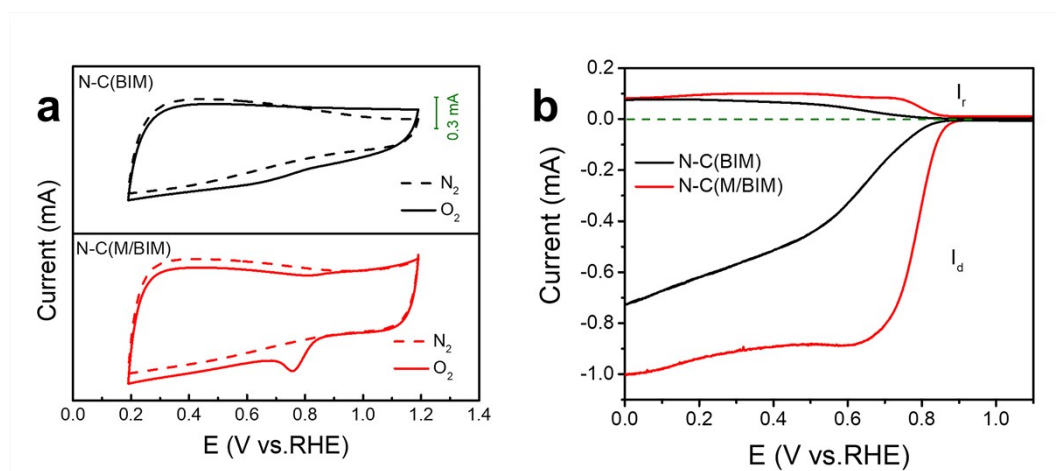

Figure S10. (a) CV curves of N-C(BIM) and N-C(M/BIM) on glassy carbon electrodes in O<sub>2</sub>-saturated (solid line) and N<sub>2</sub>-saturated (dash line) 0.1 M KOH; (b) Rotating ring-disk electrode voltammograms recorded with N-C(BIM) and N-C(M/BIM) in O<sub>2</sub>-saturated 0.1 M KOH at 1,600 r.p.m.

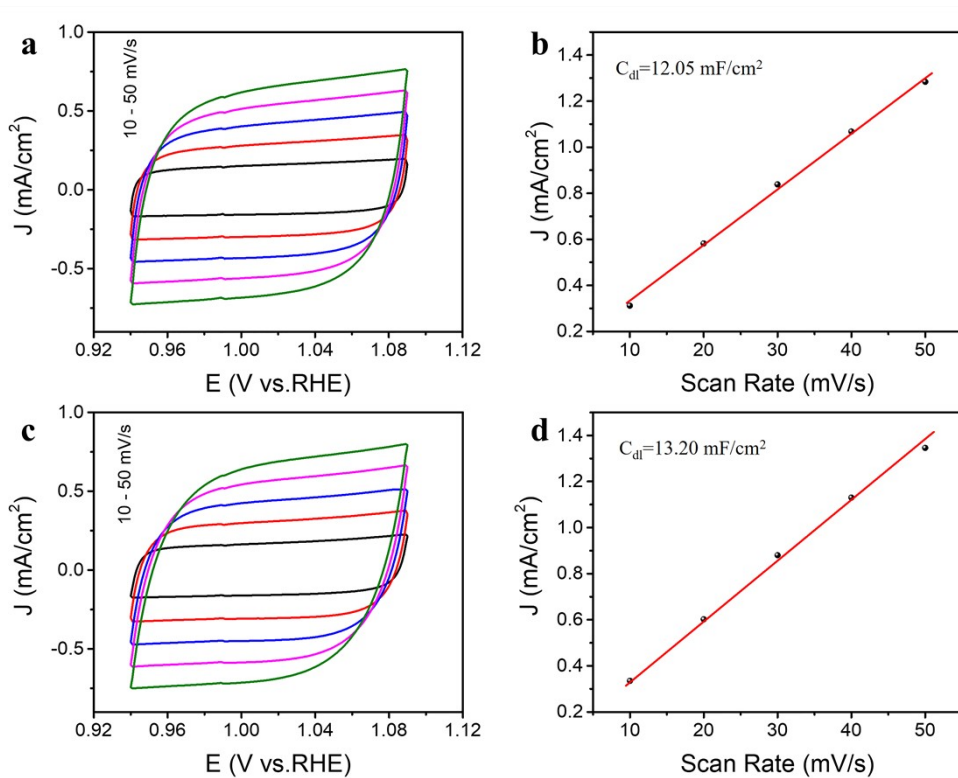

Figure S11. (a,c) CV curves of UT-N-C(M/BIM) and UT-N@N-C(M/BIM); (b,d) The capacitive current measured at 1.00 V(vs.RHE) plotted as a function of scan rate of UT-N-C(M/BIM) and UT-N@N-C(M/BIM).

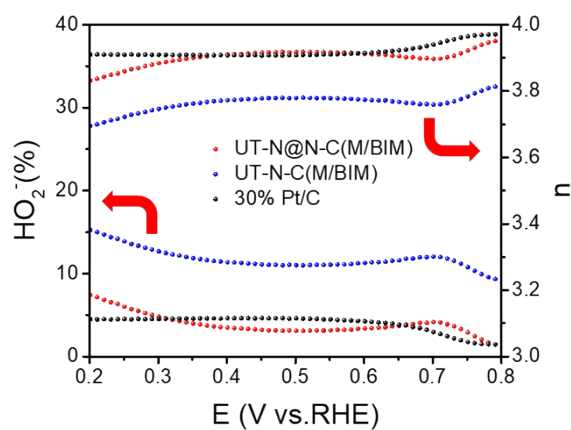

Figure S12. Percentage of peroxide (lower line) and the electron transfer number ( $n$ ) (upper line) of UT-N-C(M/BIM) and UT-N@N-C(M/BIM).

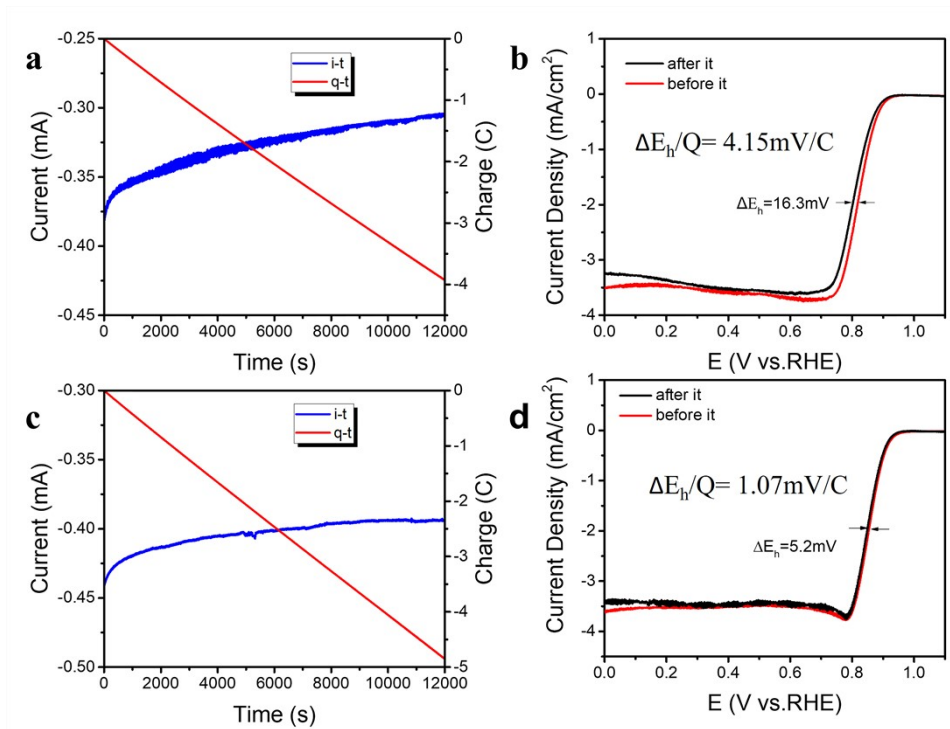

Figure S13. (a,c) I-t curves and transfer charge of UT-N-C(M/BIM) and UT-N@N-C(M/BIM); (b,d) LSV curves of UT-N-C(M/BIM) and UT-N@N-C(M/BIM) before and after i-t operation.

## Supplementary Tables

Table S1. XPS element content of MOFs-derived carbon (at.%)

|                 | C     | N     | O     | Zn   |
|-----------------|-------|-------|-------|------|
| N-C(BIM)        | 73.2  | 12.16 | 11.86 | 2.78 |
| N-C(M/BIM)      | 80.22 | 10.69 | 6.95  | 2.5  |
| UT-N-C(M/BIM)   | 85.14 | 6.82  | 7.68  | 0.36 |
| UT-N@N-C(M/BIM) | 87.52 | 6.71  | 5.62  | 0.15 |

Table S2. Different N content of MOFs-derived carbon (%)

|                 | N <sub>1</sub> | N <sub>2</sub> | N <sub>3</sub> | N <sub>4</sub> | N <sub>5</sub> |
|-----------------|----------------|----------------|----------------|----------------|----------------|
| N-C(BIM)        | 37             | 26             | 11             | 7              | 19             |
| N-C(M/BIM)      | 51             | 9              | 19             | 11             | 10             |
| UT-N-C(M/BIM)   | 30             | 15             | 13             | 39             | 3              |
| UT-N@N-C(M/BIM) | 33             | 10             | 18             | 34             | 5              |

Table S3. ORR performance of previous reports and this work

| Catalysts       | E <sub>onset</sub> (V) | E <sub>1/2</sub> (V) | Ref. |
|-----------------|------------------------|----------------------|------|
| UT-N@N-C(M/BIM) | 0.98                   | 0.89                 | -    |
| LTHT-FeP        | 0.92                   | 0.83                 | [1]  |
| NFLGDY-900c     | 0.97                   | 0.87                 | [2]  |
| AgCINW-0        | 1.01                   | 0.82                 | [3]  |
| Fe-N-AC-1000    | 0.96                   | 0.89                 | [4]  |

## Reference

- [1] N. Zion, D. A. Cullen, P. Zelenay and L. Elbaz, *Angewandte Chemie*, 2020, **132**, 2504-251
- [2] W. Sun and S. X. Dou, *Chem*, 2018, **4**, 2024-2026.
- [3] S.-j. Kim, S.-C. Lee, C. Lee, M. H. Kim and Y. Lee, *Nano Energy*, 2018, **48**, 134-143.
- [4] F. Zhang, D. Zhang, W. Liu, X. Li and Q. Chen, *Carbon*, 2022, **187**, 67-77
